# Supplementary material for: Climatic and geographic predictors of life history variation in Eastern Massasauga (Sistrurus catenatus): A range-wide synthesis
Source: PLoS One. 2017 Feb 14;12(2):e0172011. doi: 10.1371/journal.pone.0172011 (PMC5308788; doi:10.1371/journal.pone.0172011)
Supplement: S2 File — Data compiled from sources in Table 1. These data were used to create Tables 2 and 3 and Figs 3–8. Due to the Eastern Massasauga’s federally threated status, site specific Cartesian coordinates used in analyses have been redacted. (XLSX) [file pone.0172011.s002.xlsx]

## Sheet: EMRV
State.Province	County.District	CD.code	Station_.Latititude	Station_.Longitude	Station	FFD	GDD	Temp	Precip	Neonate.SVL	Neonate.Mass	litter.size	Mat.SVL.littersize	Mat.SVL.littersize.Ln	Backtrans.Mat.SVL.littersize.Ln	Age_0_growthdayslope	Age_1_growthdayslope	Age_0_growthAnnual	Age_1_growthAnnual	MeanSVL.Largest.tenMales	MeanSVL.Largest.tenFemales	Proportion.GravidFemales
IA	Bremer	IA	42.8133	-92.2574	TRIPOLI IA US	179	1509.44	7.88889	931.164	19	10.1	9.5	NA	NA	NA	0.061661	0.059529	3.638	9.58417	67.7	61.4	NA
IL	Clinton	IL.1	38.6308	-89.3658	CARLYLE RESERVOIR IL US	218	2180.56	12.5556	1104.9	20.52	10.13	6.92593	-11.794	-6.72924	5.412	0.075445	0.074944	7.77083	15.6633	75.39	69.29	0.225
IL	DuPage	IL.2	41.995	-87.9336	CHICAGO OHARE INTERNATIONAL AIRPORT IL US	198	1698.33	9.94444	937.006	NA	NA	NA	NA	NA	NA	NA	NA	NA	NA	NA	NA	NA
IL	Cook.Lake	IL.3	42.1208	-87.9047	CHICAGO PALWAUKEE AIRPORT IL US	198	1638.33	9.77778	847.09	NA	NA	9.45455	NA	NA	NA	NA	NA	NA	NA	NA	NA	NA
IL	Piatt	IL.4	40.0528	-88.3729	CHAMPAIGN 9 SW IL US	197	1778.89	10.5556	1009.65	20.13	NA	6.3	NA	NA	NA	NA	NA	NA	NA	NA	NA	NA
IL	Warren	IL.5	40.7086	-90.3628	AVON, IL US	190	1767.22	10.2222	941.832	NA	NA	NA	NA	NA	NA	NA	NA	NA	NA	NA	NA	NA
IL	Will	IL.6	41.4947	-87.6802	PARK FOREST IL US	200	1766.11	10.0556	1042.16	NA	NA	NA	NA	NA	NA	NA	NA	NA	NA	NA	NA	NA
IN	Hendricks	IN.1	39.9232	-86.5984	JAMESTOWN IN US	192	1782.78	10.5556	1088.14	NA	NA	NA	NA	NA	NA	NA	NA	NA	NA	NA	NA	NA
IN	LaGrange	IN.2	41.6293	-85.4143	LAGRANGE IN US	184	1567.78	9.33333	959.612	20.3	10.4	8.8	NA	NA	NA	NA	0.081712	NA	13.9728	62.4	NA	NA
IN	Marshall	IN.3	41.3392	-86.3358	PLYMOUTH IN US	190	1647.22	9.61111	1027.18	NA	NA	NA	NA	NA	NA	NA	NA	NA	NA	NA	NA	NA
MI	Barry	MI.1	42.6422	-85.2875	HASTINGS MI US	171	1373.33	8.44444	950.468	NA	NA	8.8	-8.32342	-6.16622	9.50328	NA	0.063908	NA	9.77792	61.5	62.2	0.58
MI	Cass	MI.2	41.9856	-86.132	DOWAGIAC 1 W MI US	175	1426.11	8.77778	1034.8	18.6	11.1	7.6	-10.4359	-6.48842	6.88562	0.064588	0.102177	5.16704	16.6549	63.2	60.9	0.62
MI	Kalkaska	MI.3	44.6541	-84.6994	GRAYLING MI US	131	1018.89	5.77778	853.694	18.2	8.7	9	-9.31435	-6.30568	8.26619	NA	NA	NA	NA	62.6	56.6	NA
MI	Lenawee	MI.4	42.0027	-83.9336	TECUMSEH MI US	191	1502.22	9.22222	906.526	NA	NA	NA	NA	NA	NA	NA	NA	NA	NA	NA	57.6	NA
MI	Oakland	MI.5	42.698	-83.4716	WHITE LAKE 4 E MI US	173	1316.67	8.27778	869.696	NA	NA	NA	NA	NA	NA	NA	NA	NA	NA	NA	NA	NA
MI	Van Buren.Paw Paw	MI.6	42.2347	-85.5519	KALAMAZOO BATTLE CREEK INTERNATIONAL AIRPORT MI US	190	1568.89	9.61111	907.796	NA	NA	NA	NA	NA	NA	NA	NA	NA	NA	NA	NA	NA
MI	Washtenaw	MI.7	42.2417	-83.6933	ANN ARBOR SE MI US	191	1449.44	9	912.114	NA	NA	NA	NA	NA	NA	NA	NA	NA	NA	NA	57.3	NA
NY	Genessee	NY.1	43.0303	-78.1692	BATAVIA NY US	191	1515	9.38889	897.636	18.6	10.7	4	NA	NA	NA	NA	NA	NA	NA	NA	59.2	NA
NY	Onondaga	NY.2	43.1111	-76.1038	SYRACUSE HANCOCK INTERNATIONAL AIRPORT NY US	187	1453.89	9.05556	977.138	17.5	11.5	8.8	NA	NA	NA	0.039424	NA	2.7202560	NA	66.4	64.58	0.82
OH	Ashtabula	OH.1	41.7781	-80.6958	ASHTABULA CO AIRPORT OH US	192	1432.78	9.55556	912.876	19.3	8.8	6.5	NA	NA	NA	0.116024	0.120916	7.54156	21.2812	NA	NA	NA
OH	Champaign	OH.2	40.1	-83.7833	URBANA WWTP OH US	190	1728.33	10.5556	1061.72	NA	NA	NA	NA	NA	NA	NA	NA	NA	NA	NA	NA	NA
OH	Clark	OH.3	39.9667	-83.8167	SPRINGFIELD NEW WW OH US	190	1728.89	10.5556	978.154	NA	NA	NA	NA	NA	NA	NA	NA	NA	NA	NA	NA	NA
OH	Greene	OH.4	39.7633	-84.1911	DAYTON MCD OH US	221	2139.44	12.2778	1024.38	NA	NA	NA	NA	NA	NA	NA	NA	NA	NA	NA	NA	NA
OH	Greene.Warren	OH.5	39.6167	-83.9	XENIA 6 SSE OH US	207	1936.67	11.8889	1062.74	NA	NA	NA	NA	NA	NA	NA	NA	NA	NA	NA	NA	NA
OH	Hardin	OH.6	40.6489	-83.6061	KENTON OH US	200	1777.22	10.4444	925.322	NA	NA	NA	NA	NA	NA	NA	NA	NA	NA	NA	NA	NA
OH	Trumball	OH.7	41.2544	-80.6739	YOUNGSTOWN REGIONAL AIRPORT OH US	186	1467.78	9.5	988.314	NA	NA	NA	NA	NA	NA	NA	NA	NA	NA	NA	NA	NA
OH	Wyandot	OH.8	40.6167	-83.1333	MARION 2 N OH US	185	1625	9.88889	997.712	19.6	10	7.8	-8.90348	-6.26426	8.61581	0.100509	0.095102	8.54326	15.9771	61.8	63.1	NA
ONT	Bruce	ONT.1	44.7458	-81.1072	*WIARTON A	166	988.2	6.6	1047.9	19	10.3	5.2	NA	NA	NA	NA	NA	NA	NA	70.1	58.3	NA
ONT	Essex	ONT.2	42.2756	-82.9556	*WINDSOR A	207	1634	9.9	934.6	20.7	11	12.5	NA	NA	NA	NA	NA	NA	NA	NA	NA	NA
ONT	MacTier	ONT.3	45.1333	-79.4	BEATRICE 2	110	875.3	4.8	1197.7	20.3	11.6	11.7	-8.02931	-6.15115	9.64754	0.04925	0.091781	2.31475	11.3808	NA	68.7	0.65
ONT	Parry Sound.Beausoliel Island	ONT.4	44.9667	-79.3	MUSKOKA A	136	939.8	5.2	1105.1	NA	NA	NA	NA	NA	NA	NA	NA	NA	NA	76.3	72.4	NA
ONT	Parry Sound	ONT.5	45.6167	-79.8833	*DUNCHURCH	125	939.1	4.9	1118.2	19.3	10.4	13.3	NA	NA	NA	NA	NA	NA	NA	NA	NA	NA
ONT	Parry Sound.Killbear	ONT.6	45.1333	-79.4	BEATRICE 2	110	875.3	4.8	1197.7	19.6	11.6	11	-9.25176	-6.29542	8.35151	NA	NA	NA	NA	71.1	73.9	0.71
ONT	Welland	ONT.7	42.8833	-79.25	*PORT COLBORNE	196	1424.7	9.2	984.6	18.2	9.1	9.4	-9.59318	-6.36574	7.78437	0.028155	0.123179	2.22424	22.1722	68.8	64.3	NA
PA	Butler.Venango	PA	40.85	-79.9167	BUTLER 2 SW PA US	177	1411.11	9.33333	1061.97	18.6	10.5	7.00278	-10.336	-6.52707	6.62462	0.059325	0.072561	3.85613	11.247	59	61.6	0.577778
WI	Buffalo	WI.1	44.2813	-92.1943	THEILMAN MN US	158	1392.78	7	849.63	NA	9.7	12.8	-6.57692	-6.05141	10.6595	NA	0.142027	NA	20.7359	70.1	65.2	0.810606
WI	Juneau.Monroe	WI.2	43.997	-90.035	NECEDAH 2 SE WI US	137	1330	7.16667	828.548	NA	8.3	NA	NA	NA	NA	NA	NA	NA	NA	NA	NA	NA

## Sheet: TOTALS_NAs REMOVED
State.Province	County.District	C.D	Neonate.SVL	Neonate.Mass	MeanNumberofOffspring.PerLitter	Litter size.femaleSVL_elevations.Ln	Backtransformed.offspring	DatesofParturition.EarliestDateNeonatesObserved	Age_0_growthcm.day.slope	Age_1_growthcm.day.slope	MeanSVL.Males>40.0	MeanSVL.Females>40.0	MeanSVL.Largest10Males	MeanSVL.Largest10Females	MeanSVL.20largestadults	SizeatMaturity-Male	SizeatMaturity-Female	Proportion.GravidFemales	Age.FirstReproduction	Hibernation.Ingress	Hibernation.Egress	Citations	Source.unpublished
IA	Bremer	Bremer, IA	19	10.1	9.5			8-22 Aug	0.061661	0.059529	58.2	53	67.7	61.4	64.55	53.3	44	0.27	2-3 yr	10 Oct - 3 Nov	22 Mar - 13 Apr		T. VanDeWalle
IL	Clinton	Clinton, IL	20.52	10.13	6.92593	-6.72924	5.412	22 July - 22 Aug (captive born)	0.075445	0.074944	58.84	56.8278	75.39	69.29	72.34	45.4	49.7	0.225	2-3 yr	27 Sep - 8 Nov	22 Feb - 30 Ap	Aldridge et al. 2008; Allender et al. 2006; Dreslik 2005, 2011; Jellen 2005; Shepard et al. 2004	M. Dreslik, C. Phillips
IL	DuPage	DuPage, IL						19-30 Aug														Tobiasz 1941
IL	Cook.Lake	Cook & Lake, IL			9.45455			23 Jul - 23 Aug										0.78		10 Sep	8 May	Anton 1993, 1999, 2000, Wright 1941	T. Anton, M. Redmer
IL	Piatt	Piatt, IL	20.13		6.3			22 Jul - 5 Aug															C. Phillips
IL	Warren	Warren, IL						12 Aug											2 yr	14 Oct	30 Apr	Bielema 1973
IL	Will	Will, IL																		2 Nov	1 Apr		D. Mauger, T. Anton
IN	Hendricks	Hendricks, IN						ca. 1 Sep														Hay 1887
IN	LaGrange	LaGrange, IN	20.3	10.4	8.8			8-18 Aug		0.081712	57.1		62.4				46.5			Oct	April	Marshall et al. 2006	J. Marshall, B. Kingsbury
IN	Marshall	Marshall, IN						14 Aug														Adler 1960
MI	Barry	Barry, MI			8.8	-6.16622	9.50328	9-24 Aug		0.063908	53.8	53.7	61.5	62.2	61.85	44	42.2	0.58		20 Oct	5Apr	Foster et al. 2009, Bailey et al. 2011	R. Baily, K. Bissell, R. Campa, D. Bradke, B. Kiel
MI	Cass	Cass, MI	18.6	11.1	7.6	-6.48842	6.88562	21 Jul - 14 Aug	0.064588	0.102177	51	52.6	63.2	60.9	62.05	43.3	46.1	0.62	2-3 yr	27 Sep-15 Oct	17 Mar - 2 May	Cross 2009	M. Cross, E. Hileman
MI	Kalkaska	Kalkaska, MI	18.2	8.7	9	-6.30568	8.26619	7 Aug - 7 Sep			54.2	50.8	62.6	56.6	59.6	49.3	48			early- to mid-Oct	April	Bieser 2008, DeGregorio 2008, DeGregorio et al. 2011a, 2011b, Smith 2009	N. Beiser, B. DeGregrio, B. Kingsbury, J. Manning, J. Marshall, J. Refsnider, C. Smith
MI	Lenawee	Lenawee, MI						13 Aug - 4 Sep				52.6		57.6						28 Sep - 5 Oct	4 Apr	Moore 2004, Moore & Gillingham 2006	J. Moore
MI	Oakland	Oakland, MI																		mid-Oct	late Mar	Sage 2005, Hecht 2007	S. Hecht, J. Sage, C. Smith, B. Kingsbury
MI	Van Buren.Paw Paw	Paw Paw, MI																			18 Apr		M. Cross, J. Moore
MI	Washtenaw	Washtenaw, MI						29 Aug - 7 Sep				53.1		57.3			46						G. Casper, T. Anton, D. Mauger, Y. Lee
NY	Genessee	Genessee, NY	18.6	10.7	4			9 - 22 Aug				53.8		59.2			43	0.66				Shoemaker & Gibbs 2010	J. Adamski, K. Shoemaker
NY	Onondaga	Onondaga, NY	17.5	11.5	8.8			16-27 Aug	0.039424		56.32	53.3198	66.4	64.58	65.49		39.6	0.82		11 Sep - 24 Oct	15-29 Apr	Johnson 1995, Shoemaker & Gibbs 2010	G. Johnson, K. Shoemaker, B. Johnson, J. Gibbs, T. Bell
OH	Ashtabula	Ashtabula, OH	19.3	8.8	6.5			17 Aug	0.116024	0.120916							49			6 Oct	24 Apr		G. Lipps, D. Wynn
OH	Champaign	Champaign, OH						4 Aug												7 Oct	28 Apr		J. Davis
OH	Clark	Clark, OH						13 Aug												22 Oct	19 May		J. Davis
OH	Greene	Greene, OH						7-21 Aug														Watkins-Colwell 1995
OH	Greene.Warren	Warren, OH																		29 Oct	19 Apr		J. Davis
OH	Hardin	Hardin, OH																				Conant 1938, 1951
OH	Trumball	Trumball, OH																			late Mar	Maple 1968, Maple & Orr 1968
OH	Wyandot	Wyandot, OH	19.6	10	7.8	-6.26426	8.61581	20 Jul - 23 Aug	0.100509	0.095102	52.4	52.8	61.8	63.1	62.45		45			16 Sep - 22 Oct	14 Mar - 19 May		D. Wynn
ONT	Bruce	Bruce, ONT	19	10.3	5.2			13 - 29 Aug			57.1	52.1	70.1	58.3	64.2	49.6	48.3			17-26 Oct	27 Apr - 14 May	Parker & Prior 1999, Harvey 2006, Harvey & Weatherhead 2006a, b, 2010, 2011, Weatherhead et al. 2009	D. Harvey
ONT	Essex	Essex, ONT	20.7	11	12.5			26 Jul											4 yr	16 Sep - 17 Oct	15-27 Apr		P. Pratt, K. Cedar, T. Preney, A. Lentini
ONT	MacTier	MacTier, ONT	20.3	11.6	11.7	-6.15115	9.64754	8-19 Aug	0.04925	0.091781	56.9	55.8		68.7	68.7		52	0.65	4-6 yr	starts ca. 1 Sep	starts ca. 15 May		J. Rouse
ONT	Parry Sound.Beausoliel Island	Beausoliel Island, ONT									55.6	54.7	76.3	72.4	74.35					19-30 Sep	23 Mar - 29 Apr	Jones 2012	A. Promaine, K. Prior, S. Sutton, M. Desjardins, P. Jones
ONT	Parry Sound	Parry Sound, ONT	19.3	10.4	13.3														5 yr	Oct	early May	Parent 1997, Parent & Weatherhead 2000
ONT	Parry Sound.Killbear	Killbear, ONT	19.6	11.6	11	-6.29542	8.35151	16 Jul - 21 Aug			56.3	57.4	71.1	73.9	72.5		51	0.71	4-6 yr	starts ca. 1 Sep	starts ca 15 May	Rouse 2006	J. Rouse
ONT	Welland	Welland, ONT	18.2	9.1	9.4	-6.36574	7.78437	10-31 Aug	0.028155	0.123179	62.7	58.3	68.8	64.3	66.55	47	47.5	0.33	3 yr	17-29 Oct	11 Apr - 4 May		A. Yagi
PA	Butler.Venango	Butler & Ven., PA	18.6	10.5	7.00278	-6.52707	6.62462	30 Jul - 29 Sep	0.059325	0.072561	51	51.5	59	61.6	60.3	42.5	45.1	0.577778	2-3 yr	3-Oct - 8-Nov	30 Mar - 24 Apr	Swanson 1933, Reinert 1978, Reinert 1981	B. Jellen, M. Kowalski, H. Reinert
WI	Buffalo	Buffalo, WI		9.7	12.8	-6.05141	10.6595	19 Aug - 7 Sep		0.142027	57.6	56.7	70.1	65.2	67.65		53	0.810606	3 yr		25 Apr	, Keenlynne 1968, 1978, Keenlyne & Beer 1973	R. Paloski, R. Hay
WI	Juneau.Monroe	Juneau, WI		8.3																		Durbian et al. 2008; King et al. 2004
		TOTALS	17	18	20	10	10	0	9	11	15	17	14	17	14	8	17	12	0	0	0

## Sheet: Sheet3
Adult female sites	IA = Bremer, IA; IL.1 = Clinton, IL; MI.1 = Barry, MI; MI.2 = Cass, MI; MI.3 = Kalkaska, MI; MI.4 = Lenawee, MI; MI.7 = Washtenaw, MI; NY.1 = Genessee, NY; NY.2 = Onondaga, NY; OH.8 = Wyandot, OH; ONT.1 = Bruce, ONT; ONT.3 = MacTier, ONT; ONT.4 = Beausoliel Island, ONT; ONT.6 = Killbear, ONT; ONT.7 = Welland, ONT; PA = Butler and Venango, PA; WI.1 = Buffalo, WI			IA = Bremer, IA	IL.1 = Clinton, IL	MI.1 = Barry, MI	MI.2 = Cass, MI	MI.3 = Kalkaska, MI	MI.4 = Lenawee, MI	MI.7 = Washtenaw, MI	NY.1 = Genessee, NY	NY.2 = Onondaga, NY	OH.8 = Wyandot, OH	ONT.1 = Bruce, ONT	ONT.3 = MacTier, ONT	ONT.4 = Beausoliel Island, ONT	ONT.6 = Killbear, ONT	ONT.7 = Welland, ONT	PA = Butler and Venango, PA	WI.1 = Buffalo, WI
Neonate mass	IA = Bremer, IA; IL.1 = Clinton, IL; IN.2 = LaGrange, IN; MI.2 = Cass, MI; MI.3 = Kalkaska, MI; NY.1 = Genessee, NY; NY.2 = Onondaga, NY; OH.1 = Ashtabula, OH; OH.8 = Wyandot, OH; ONT.1 = Bruce, ONT; ONT.2 = Essex, ONT; ONT.3 = MacTier, ONT; ONT.5 = Parry Sound, ONT; ONT.6 = Killbear, ONT; ONT.7 = Welland, ONT; PA = Butler and Venango, PA; WI.1 = Buffalo, WI; WI.2 = Juneau, WI			IA = Bremer, IA	IL.1 = Clinton, IL	IN.2 = LaGrange, IN	MI.2 = Cass, MI	MI.3 = Kalkaska, MI	NY.1 = Genessee, NY	NY.2 = Onondaga, NY	OH.1 = Ashtabula, OH	OH.8 = Wyandot, OH	ONT.1 = Bruce, ONT	ONT.2 = Essex, ONT	ONT.3 = MacTier, ONT	ONT.5 = Parry Sound, ONT	ONT.6 = Killbear, ONT	ONT.7 = Welland, ONT	PA = Butler and Venango, PA	WI.1 = Buffalo, WI	WI.2 = Juneau, WI
Litter size	IA = Bremer, IA; IL.1 = Clinton, IL; IL.3 = Cook and Lake, IL; IL.4 = Piatt, IL; IN.2 = LaGrange, IN; MI.1 = Barry, MI; MI.2 = Cass, MI; MI.3 = Kalkaska, MI; NY.1 = Genessee, NY; NY.2 = Onondaga, NY; OH.1 = Ashtabula, OH; OH.8 = Wyandot, OH; ONT.1 = Bruce, ONT; ONT.2 = Essex, ONT; ONT.3 = MacTier, ONT; ONT.5 = Parry Sound, ONT; ONT.6 = Killbear, ONT; ONT.7 = Welland, ONT; PA = Butler and Venango,…			IA = Bremer, IA	IL.1 = Clinton, IL	IL.3 = Cook and Lake, IL	IL.4 = Piatt, IL	IN.2 = LaGrange, IN	MI.1 = Barry, MI	MI.2 = Cass, MI	MI.3 = Kalkaska, MI	NY.1 = Genessee, NY	NY.2 = Onondaga, NY	OH.1 = Ashtabula, OH	OH.8 = Wyandot, OH	ONT.1 = Bruce, ONT	ONT.2 = Essex, ONT	ONT.3 = MacTier, ONT	ONT.5 = Parry Sound, ONT	ONT.6 = Killbear, ONT	ONT.7 = Welland, ONT	PA = Butler and Venango, PA	WI.1 = Buffalo, WI
Maternal SVL-litter size	IL.1 = Clinton, IL; MI.1 = Barry, MI; MI.2 = Cass, MI; MI.3 = Kalkaska, MI; OH.8 = Wyandot, OH; ONT.3 = MacTier, ONT; ONT.6 = Killbear, ONT; ONT.7 = Welland, ONT; PA = Butler and Venango, PA; WI.1 = Buffalo, WI			IL.1 = Clinton, IL	MI.1 = Barry, MI	MI.2 = Cass, MI	MI.3 = Kalkaska, MI	OH.8 = Wyandot, OH	ONT.3 = MacTier, ONT	ONT.6 = Killbear, ONT	ONT.7 = Welland, ONT	PA = Butler and Venango, PA	WI.1 = Buffalo, WI

## Sheet: sites for each analysis
Adult female sites	IA = Bremer, IA; IL.1 = Clinton, IL; MI.1 = Barry, MI; MI.2 = Cass, MI; MI.3 = Kalkaska, MI; MI.4 = Lenawee, MI; MI.7 = Washtenaw, MI; NY.1 = Genessee, NY; NY.2 = Onondaga, NY; OH.8 = Wyandot, OH; ONT.1 = Bruce, ONT; ONT.3 = MacTier, ONT; ONT.4 = Beausoliel Island, ONT; ONT.6 = Killbear, ONT; ONT.7 = Welland, ONT; PA = Butler and Venango, PA; WI.1 = Buffalo, WI
Neonate mass	IA = Bremer, IA; IL.1 = Clinton, IL; IN.2 = LaGrange, IN; MI.2 = Cass, MI; MI.3 = Kalkaska, MI; NY.1 = Genessee, NY; NY.2 = Onondaga, NY; OH.1 = Ashtabula, OH; OH.8 = Wyandot, OH; ONT.1 = Bruce, ONT; ONT.2 = Essex, ONT; ONT.3 = MacTier, ONT; ONT.5 = Parry Sound, ONT; ONT.6 = Killbear, ONT; ONT.7 = Welland, ONT; PA = Butler and Venango, PA; WI.1 = Buffalo, WI; WI.2 = Juneau, WI
Litter size	IA = Bremer, IA; IL.1 = Clinton, IL; IL.3 = Cook and Lake, IL; IL.4 = Piatt, IL; IN.2 = LaGrange, IN; MI.1 = Barry, MI; MI.2 = Cass, MI; MI.3 = Kalkaska, MI; NY.1 = Genessee, NY; NY.2 = Onondaga, NY; OH.1 = Ashtabula, OH; OH.8 = Wyandot, OH; ONT.1 = Bruce, ONT; ONT.2 = Essex, ONT; ONT.3 = MacTier, ONT; ONT.5 = Parry Sound, ONT; ONT.6 = Killbear, ONT; ONT.7 = Welland, ONT; PA = Butler and Venango,…
Maternal SVL-litter size	IL.1 = Clinton, IL; MI.1 = Barry, MI; MI.2 = Cass, MI; MI.3 = Kalkaska, MI; OH.8 = Wyandot, OH; ONT.3 = MacTier, ONT; ONT.6 = Killbear, ONT; ONT.7 = Welland, ONT; PA = Butler and Venango, PA; WI.1 = Buffalo, WI
